# Supplementary material
Source: Hindawi journal article supplement (doi:10.1155/2011/513905)

# Binding assay for UDP-galactopyranose mutase from *Aspergillus fumigatus*

Jun Qi<sup>1,2</sup>, Michelle Oppenheimer<sup>1,2</sup>, Pablo Sobrado<sup>1,2,3\*</sup>

<sup>1</sup>Department of Biochemistry, <sup>2</sup>Enzyme Research and Drug Discovery Laboratory, <sup>3</sup>Fralin Life Science Institute, Virginia Tech, Blacksburg, VA 26061

psobrado@vt.edu

## Supplementary data

**Figure S1.** UV-visible spectrum and SDS-PAGE of *Af*UGM

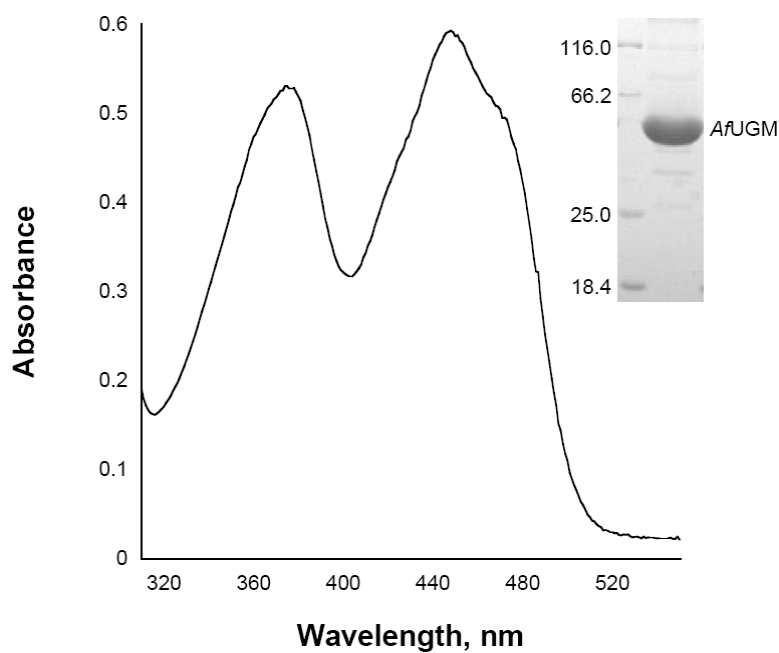

**Figure S2.**  $^1\text{H}$  NMR spectrum and high-resolution mass spectrum of chromophore **1**

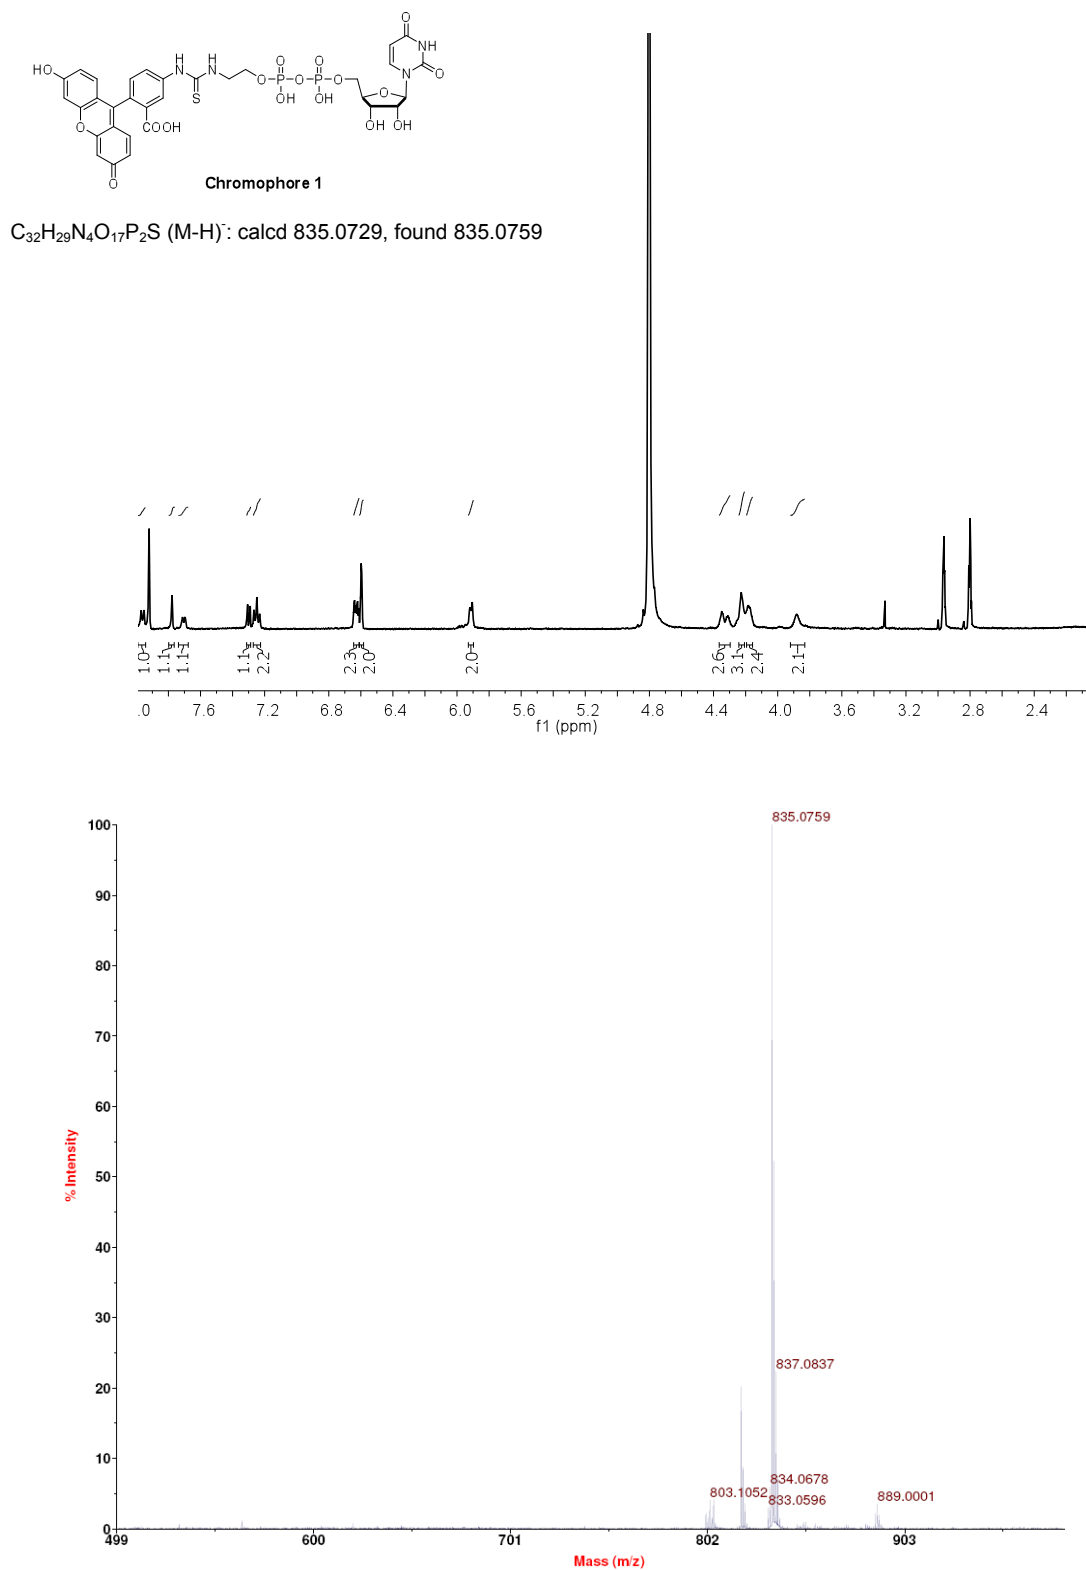

**Figure S3.**  $^1\text{H}$  NMR spectrum and high-resolution mass spectrum of chromophore 2

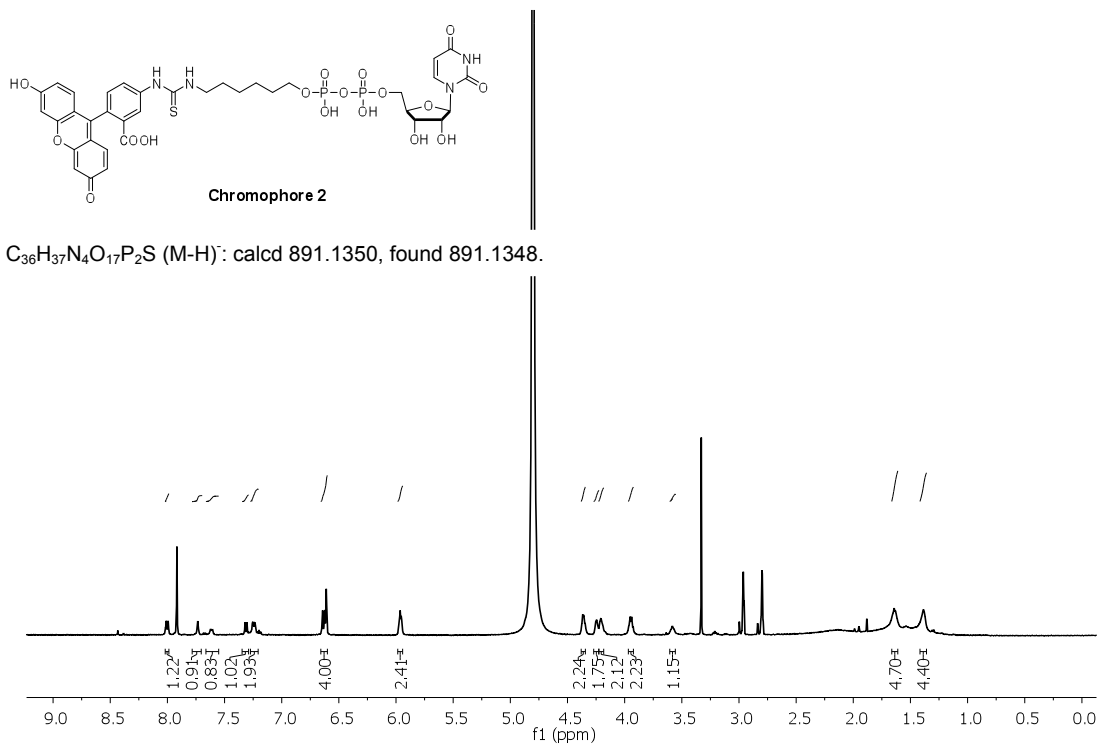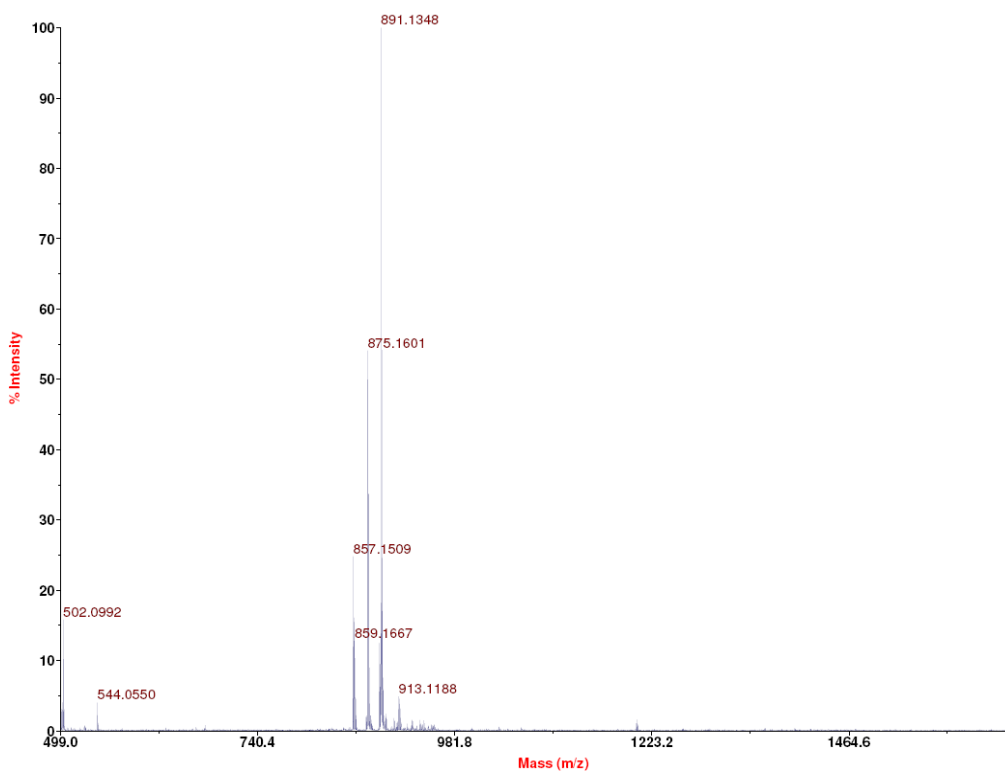

**Figure S4.**  $^1\text{H}$  NMR spectrum and high-resolution mass spectrum of chromophore **3**

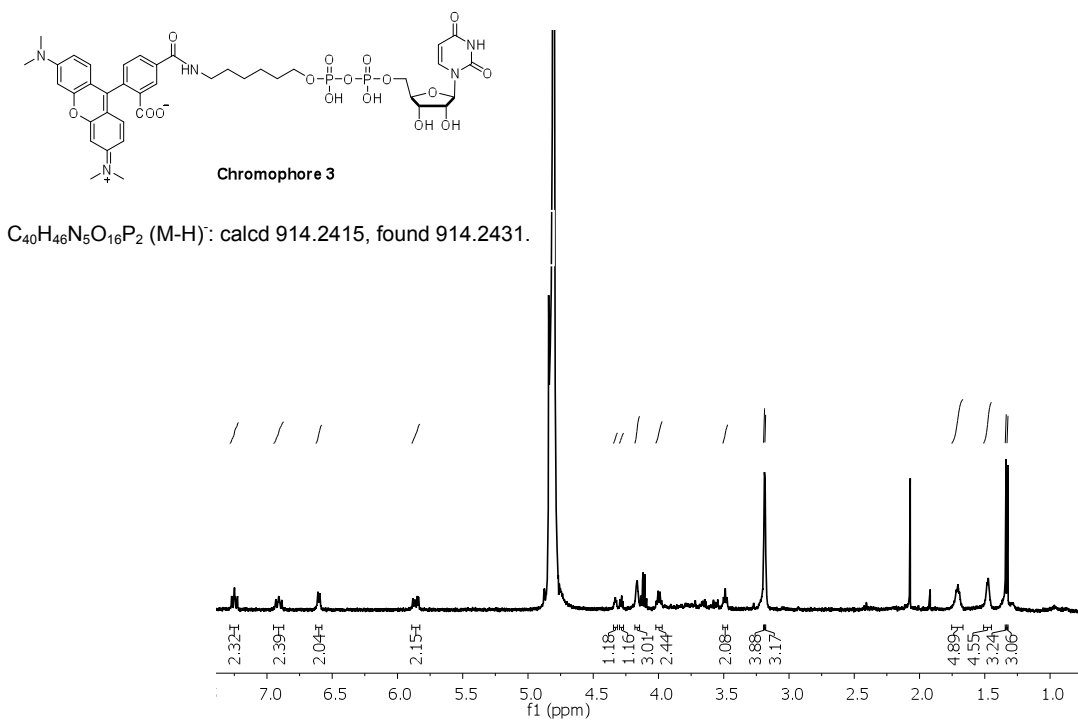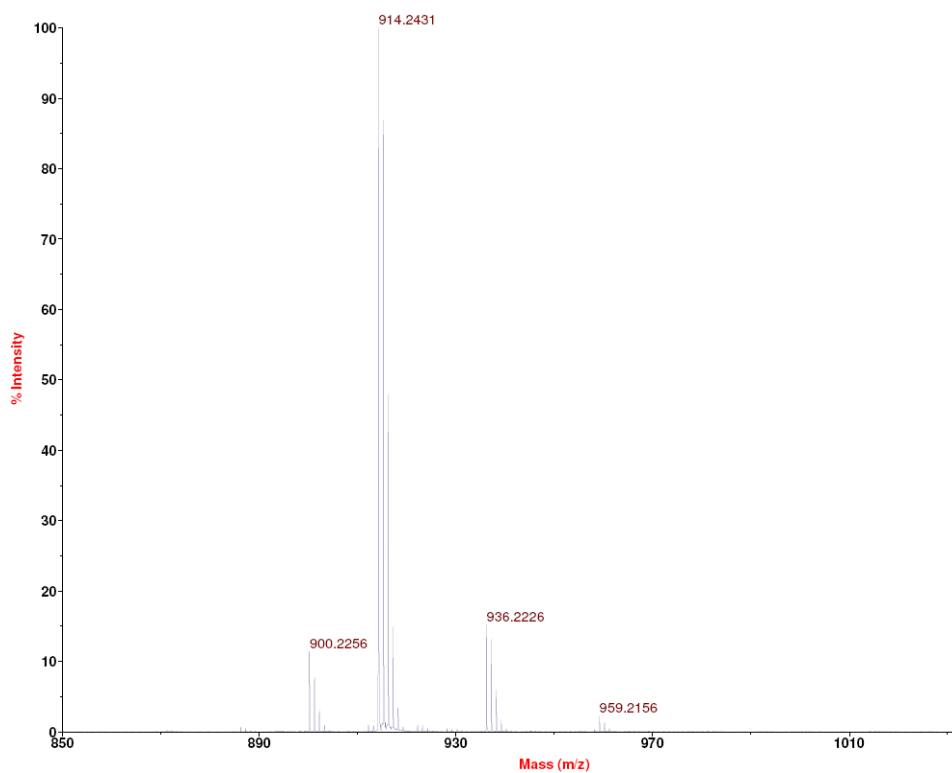

**Figure S5.** High-resolution mass spectrum of chromophore 2

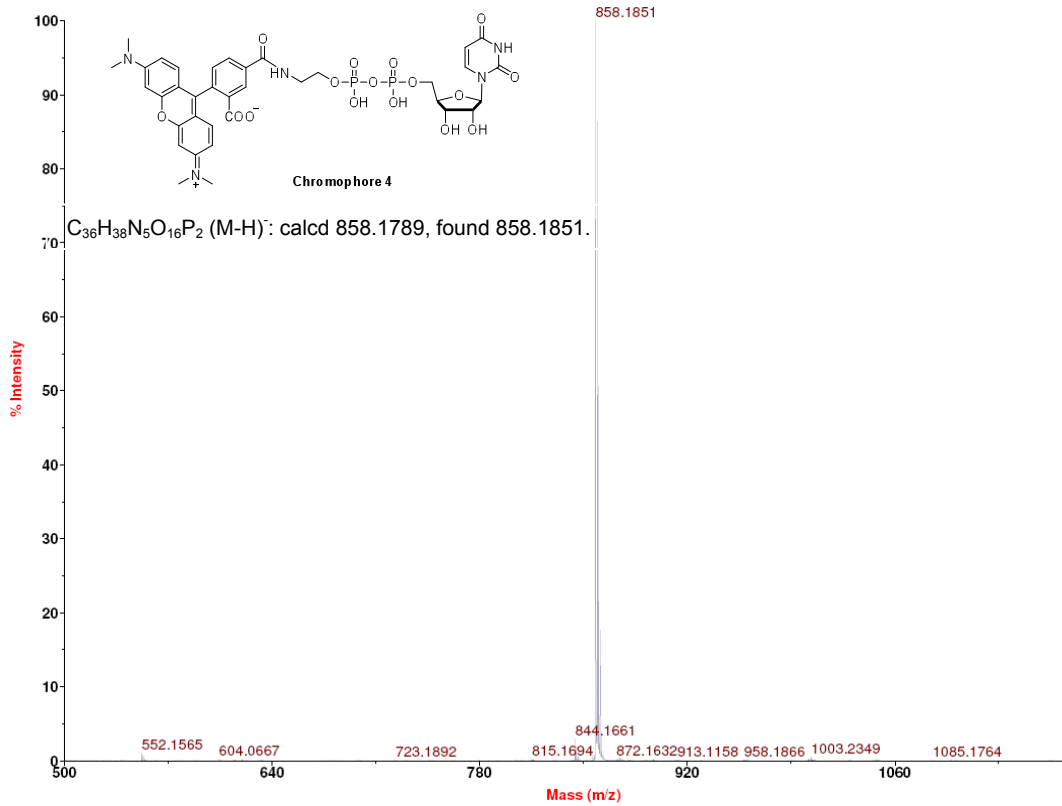

Supplement: f1 [file 513905.f1.pdf]
